# Supplementary material for: Capture-Based Next-Generation Sequencing Improves the Identification of Immunoglobulin/T-Cell Receptor Clonal Markers and Gene Mutations in Adult Acute Lymphoblastic Leukemia Patients Lacking Molecular Probes
Source: PubMed Central journal article supplement (PMC7352935; doi:10.3390/cancers12061505), 2020-06-09
Supplement: cancers-12-01505-s001.pdf [file cancers-12-01505-s001.pdf]

# Capture-based Next-Generation Sequencing Improves the Identification of Immunoglobulin/T-Cell Receptor Clonal Markers and Gene Mutations in Adult Acute Lymphoblastic Leukemia Patients Lacking Molecular Probes

Roberta Cavagna, Marie L. Guinea Montalvo, Manuela Tosi, Michela Paris, Chiara Pavoni, Tamara Intermesoli, Renato Bassan, Andrea Mosca, Alessandro Rambaldi and Orietta Spinelli

Table S1. List of genes included in the enhanced version of the capture-NGS panel (panel v2).

| Gene Name     | Chromosome |
|---------------|------------|
| <i>ALB</i>    | chr4       |
| <i>BRAF</i>   | chr7       |
| <i>CREBBP</i> | chr16      |
| <i>EZH2</i>   | chr7       |
| <i>FBXW7</i>  | chr4       |
| <i>FLT3</i>   | chr13      |
| <i>IDH1</i>   | chr2       |
| <i>IDH2</i>   | chr15      |
| <i>IKZF1</i>  | chr7       |
| <i>IL7R</i>   | chr5       |
| <i>JAK1</i>   | chr1       |
| <i>JAK2</i>   | chr9       |
| <i>JAK3</i>   | chr19      |
| <i>KRAS</i>   | chr12      |
| <i>NOTCH1</i> | chr9       |
| <i>NRAS</i>   | chr1       |
| <i>PAX5</i>   | chr9       |
| <i>PTEN</i>   | chr10      |
| <i>SH2B3</i>  | chr12      |
| <i>STIL</i>   | chr1       |
| <i>TAL1</i>   | chr1       |
| <i>TAL2</i>   | chr9       |
| <i>TET2</i>   | chr4       |
| <i>TP53</i>   | chr17      |
| <i>TYK2</i>   | chr19      |

**Table S2.** Clinical and biological characteristics of adult ALL patients evaluated for the validation of the capture-NGS panel v1, formerly studied for clonality assessment according to the conventional EuroMRD guidelines within the NILG-ALL 09/00 clinical trial. Patients have been selected for having at least two sensitive patient-specific probes (P1 and P2).

| Patient ID | Cohort | Assay  | Age at DX | Sex | ALL lineage | Blasts % | Karyotype                                                                    | Probe 1 (P1)     | P1 Assay Sensitivity | Probe 2 (P2)         | P2 Assay Sensitivity |
|------------|--------|--------|-----------|-----|-------------|----------|------------------------------------------------------------------------------|------------------|----------------------|----------------------|----------------------|
| BG_371     | R      | v1     | 41        | M   | B           | 80       | 48,XY,<br>+?8,+?13(9)/46,XY(1<br>2)                                          | TRGV3*02-J1*02   | 1,00E-05             | TRDV2*02-D3*01       | 1,00E-04             |
| BG_4502    | R      | v1     | 28        | M   | T           | 100      | 46,XY del(6)(q21),<br>t(9;10)                                                | TRGV9*01-J1*02   | 1,00E-05             | TRDV1*01-J1*01       | 1,00E-05             |
| BG_5038    | R      | v1; v2 | 56        | M   | B           | 99       | 46,XY                                                                        | TRDD2*01-DD3*01  | 1,00E-05             | IGKV1-16*02-<br>KDE  | 1,00E-05             |
| BG_5418    | R      | v1     | 39        | M   | B           | 90       | 46,XY                                                                        | IGHV3-7*02-J6*02 | 1,00E-05             | TRGV9*01-J1*02       | 1,00E-05             |
| BG_5452    | R      | v1     | 25        | M   | T           | 100      | 5q- (q31)                                                                    | TRGV10*02-J1*02  | 1,00E-04             | TRBD1-J2-3           | 1,00E-04             |
| BG_9574    | R      | v1     | 46        | M   | T           | 80       | 46,X,inv(Y),del(6)(q<br>21),t(10;14)(q24;q11<br>(12)/46idem,add(9<br>(p?)(4) | TRGV11*01-J2*01  | 1,00E-05             | TRGV4*02-J1*02       | 1,00E-04             |
| BG_9813    | R      | v1     | 16        | F   | T           | 90       | 46,XX. Molecular<br>detection of <i>SIL-<br/>TAL1</i> fusion gene            | TRDD2*01-J1*01   | 1,00E-05             | TRGV9*01-J2*01       | 1,00E-04             |
| BG_11360   | R      | v1     | 15        | F   | B           | 60       | (46,XX), 1t(1;12),<br>1del(9)                                                | TRDD2*01-D3*01   | 1,00E-04             | TRDV2*02-D3*01       | 1,00E-04             |
| BG_11720   | R      | v1     | 41        | F   | B           | 90       | 46,XX                                                                        | TRGV9*01-J1*02   | 1,00E-05             | IGHV6-1*01-<br>J6*02 | 1,00E-05             |
| BG_11806   | R      | v1     | 27        | M   | B           | 90       | 46,XY                                                                        | TRGV5*01-J1*02   | 1,00E-04             | IGHV1-2*02-<br>J5*02 | 1,00E-05             |

R: Retrospective, v1: capture-based NGS panel targeting Ig/TCR loci, v2: capture-based NGS panel targeting both Ig/TCR loci and selected genes of interest, DX: Diagnosis.

**Table S3.** Clinical and biological characteristics of adult ALL patients lacking an informative Ig/TCR molecular marker for MRD evaluation (MRD-unknown).

| Patient ID | Cohort | Assay | Age at DX | Sex | ALL lineage | Blasts % | Karyotype                                                                                                                                                |
|------------|--------|-------|-----------|-----|-------------|----------|----------------------------------------------------------------------------------------------------------------------------------------------------------|
| BG_855     | R      | v1    | 63        | F   | B           | 90       | 46,XX                                                                                                                                                    |
| BG_1125    | R      | v1    | 43        | M   | B           | 90       | Not Done                                                                                                                                                 |
| BG_2097    | R      | v1    | 62        | M   | B           | 60       | 47,XY,inv dup(iq)(ipter)<br>1q22;1q22cen;1q23)1qter),dup(2p)(2pter)2p13;2p13)qter),t(8;14)(8q24;14q32),del(13)(13pter)13q13;13q22)13qter),+mar,46,X<br>Y |
| BG_2481    | R      | v1    | 32        | M   | T           | 94       | Absence of Metaphases                                                                                                                                    |
| BG_3895    | R      | v1    | 20        | M   | T           | 47       | 46,XY                                                                                                                                                    |
| BG_4005§   | R      | v1    | 18        | M   | T           | Na       | 46,XY                                                                                                                                                    |
| BG_4255    | R      | v2    | 36        | M   | T           | 80       | 46,XY                                                                                                                                                    |
| BG_4254    | R      | v1    | 63        | F   | B           | 90       | 63-65,XX(7)/46,XX(2)                                                                                                                                     |
| BG_4379    | R      | v2    | 50        | M   | T           | 95       | 46,XY (10)                                                                                                                                               |
| BG_5702    | R      | v1    | 62        | F   | B           | 85       | Hyperdiploid (63 chr)                                                                                                                                    |
| BG_6037    | R      | v1    | 33        | F   | T           | 95       | Absence of Metaphases                                                                                                                                    |
| BG_6490    | R      | v1    | 63        | M   | B           | 95       | Triploidy in 5 Metaphases/15 normal Metaphases                                                                                                           |
| BG_8646    | R      | v1    | 59        | M   | T           | 90       | 46,XY,del(5)(q22q35),del(12)(p11p13),del(17)(p11)(18); 46, XY<br>(2)                                                                                     |
| BG_8345    | R      | v1    | 33        | F   | B           | 64       | 46,XX                                                                                                                                                    |
| BG_9445    | R      | v1    | 45        | M   | B           | 80       | 36,XY,-2,-3,-4,-7,-8,-9,-d,-16,-17,-20                                                                                                                   |
| BG_10112   | R      | v1    | 63        | M   | B           | 93       | 46,XY, t(4;11)(q21;q23)                                                                                                                                  |
| BG_10487   | R      | v1    | 20        | M   | B           | 56       | Not Evaluable                                                                                                                                            |
| BG_10640   | R      | v1    | 62        | F   | B           | 83       | Absence of Metaphases                                                                                                                                    |
| BG_11053   | R      | v1    | 25        | F   | B           | 90       | 46,XX(18). Molecular detection of <i>KMT2A-AFF1</i> transcript<br>from t(4;11)                                                                           |
| BG_11269   | R      | v2    | 33        | M   | T           | >50      | 46,XY                                                                                                                                                    |
| BG_11345   | R      | v1    | 63        | M   | T           | 90       | 48,XY+10+21/47XY, 10/47,XY+21/46XY                                                                                                                       |
| BG_11584   | R      | v2    | 38        | F   | B           | 100      | Absence of Metaphases. Molecular detection of <i>KMT2A-AFF1</i> transcript from t(4;11)                                                                  |
| BG_12438   | R      | v1    | 26        | M   | T           | >50      | 46,XY                                                                                                                                                    |
| BG_37265   | P      | v2    | 52        | M   | T-LL        | 5-10     | 46,XY (15). Poor quality metaphases                                                                                                                      |
| BG_39541*  | P      | v2    | 28        | M   | T           | 5        | Na                                                                                                                                                       |
| BG_39652*  | P      | v2    | 35        | M   | T-LL        | 30       | Na                                                                                                                                                       |
| BG_40129*  | P      | v2    | 43        | M   | T           | 96       | Na                                                                                                                                                       |
| BG_41165*  | P      | v2    | 63        | M   | T           | 71       | Na                                                                                                                                                       |
| BG_41182*  | P      | v2    | 50        | M   | B           | 95       | Na                                                                                                                                                       |
| BG_41209*  | P      | v2    | 20        | M   | T           | 63       | Na                                                                                                                                                       |
| BG_41408*  | P      | v2    | 36        | M   | T           | 70       | Na                                                                                                                                                       |
| BG_41733*  | P      | v2    | 21        | M   | T           | 70       | Na                                                                                                                                                       |
| BG_41985*  | P      | v2    | 21        | M   | B           | 95       | Na                                                                                                                                                       |
| BG_42228*  | P      | v2    | 44        | M   | T           | 83       | Na                                                                                                                                                       |
| BG_42309   | P      | v2    | 75        | F   | B           | 70       | 46,XX (4). Low number of metaphases                                                                                                                      |
| BG_10442¶  | G      | v2    | 44        | M   | T           | 40       | 54,XY,+5?,+7,+8,+8,+15?,+21?,+21,+22(6)/46,xy(1)                                                                                                         |
| BG_21292*¶ | G      | v2    | 43        | M   | T           | 99       | Na. Molecular detection of <i>SIL-TAL1</i> fusion gene                                                                                                   |

§For patient BG\_4005 the blasts percentage in the diagnostic sample was Not available (Na). \*For patients indicated with "\*", the karyotype evaluation was Not available (Na), ¶For patients BG\_10442 and BG\_21292 the Ig/TCR clonal markers assessment has been performed at diagnosis by standard procedure and not included in our study. Samples deriving from those patients have been used for the validation of the capture-based NGS panel v2 targeting both Ig/TCR loci and genes of interest (G). R: Retrospective, P: Prospective, G: Gene panel validation, v1: capture-based NGS panel targeting Ig/TCR loci, v2: capture-based NGS panel targeting both Ig/TCR loci and selected genes of interest, DX: Diagnosis.

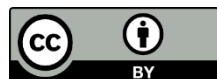

© 2020 by the authors. Licensee MDPI, Basel, Switzerland. This article is an open access article distributed under the terms and conditions of the Creative Commons Attribution (CC BY) license (<http://creativecommons.org/licenses/by/4.0/>).
